# Supplementary material
Source: Copernicus journal article supplement (doi:10.5194/egusphere-2026-2775)
Supplement: Supplementary file 1 [file egusphere-2026-2775-supplement.pdf]

## **Dust Radiative Effects and Impact on Energy Production over the Mediterranean Basin**

Dimitra Kouklaki<sup>1,2</sup>, Georgia Charalampous<sup>3,4</sup>, Anna Moustaka<sup>5,6</sup>, Alkistis Papetta<sup>7</sup>, Celia Herrero del Barrio<sup>8,9</sup>, Rizos-Theodoros Chadoulis<sup>6</sup>, S. Yeşer Aslanoğlu<sup>10</sup>, Sara Herrero-Anta<sup>8,9</sup>, Michail Mytilinaios<sup>11</sup>, Nikolaos Papadimitriou<sup>12</sup>, Katerina Anyfanti<sup>12</sup>, Christos Spyrou<sup>12</sup>, Daniela Meloni<sup>13</sup>, Konstantinos Fragkos<sup>7</sup>, Yevgeny Derimian<sup>14</sup>, Tatiana Di Iorio<sup>15</sup>, Rodanthi-Elisavet Mamouri<sup>2,3</sup>, Vassilis Amiridis<sup>1</sup>, Stavros Solomos<sup>12</sup>, Stelios Kazadzis<sup>5</sup>, and Ilias Fountoulakis<sup>12</sup>

<sup>1</sup> Institute for Astronomy, Astrophysics, Space Applications and Remote Sensing, National Observatory of Athens, Athens, Greece

<sup>2</sup> Department of Geology and Geoenvironment, National and Kapodistrian University of Athens, Greece

<sup>3</sup> Eratosthenes Centre of Excellence, Limassol, Cyprus

<sup>4</sup> Department of Civil Engineering Geomatics, Cyprus University of Technology, Limassol, Cyprus

<sup>5</sup> Physicalisch Meteorologisches Observatorium, World Radiation Center, Davos, Switzerland

<sup>6</sup> Department of Physics, Aristotle University of Thessaloniki, 54124, Greece

<sup>7</sup> Climate and Atmosphere Research Centre (CARE-C), The Cyprus Institute, Nicosia, Cyprus

<sup>8</sup> Group of Atmospheric Optics (GOA-UVa), Universidad de Valladolid, Valladolid, Spain

<sup>9</sup> Laboratory of Disruptive Interdisciplinary Science (LaDIS), Universidad de Valladolid, Valladolid, Spain

<sup>10</sup> Department of Environmental Engineering, Hacettepe University, Ankara, Türkiye

<sup>11</sup> Consiglio Nazionale delle Ricerche - Istituto di Metodologie per l'Analisi Ambientale (CNR-IMAA), Tito, Italy

<sup>12</sup> Research Centre for Atmospheric Physics and Climatology of the Academy of Athens, Greece

<sup>13</sup> Sustainable Department, National Agency for New Technologies, Energy and Sustainable Economic Development, Rome, Italy

<sup>14</sup> Univ. Lille, CNRS, UMR 8518 - LOA - Laboratoire d'Optique Atmosphérique, F-59000 Lille, France

<sup>15</sup> Laboratory for Models and Measurements for Air Quality and Climate Observations, ENEA, Rome, Italy

### S1 Additional figure

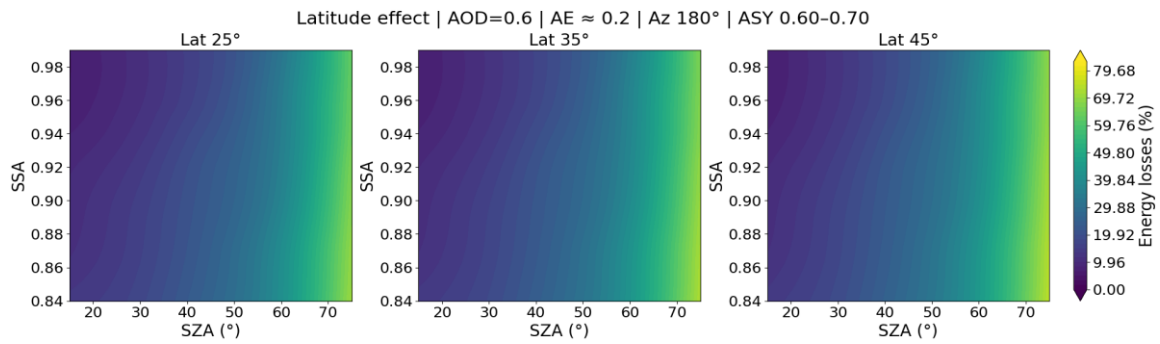

**Figure S1.** Sensitivity of PV energy losses (%) to latitude under fixed aerosol and geometric conditions. Results are presented for three latitudes (25°, 35°, and 45° N) for AOD = 0.6, AE ≈ 0.2, single scattering albedo varying between 0.84 and 0.99, and south-oriented PV panels (azimuth = 180°). The horizontal axis corresponds to the SZA, while the vertical axis represents SSA.

### S2 Additional figure

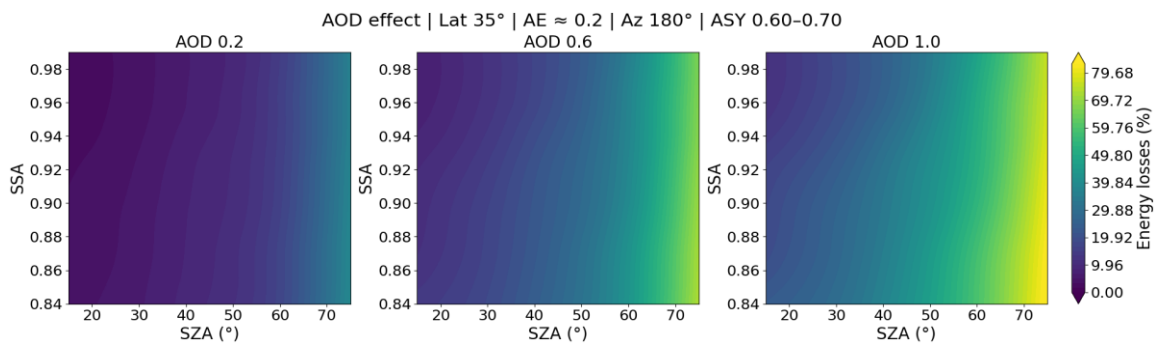

**Figure S2.** Sensitivity of PV energy losses (%) to aerosol optical depth (AOD = 0.2, 0.6, and 1.0) at latitude 35° N for AE ≈ 0.2 and south-oriented PV panels (azimuth = 180°).

### S3 Additional figure

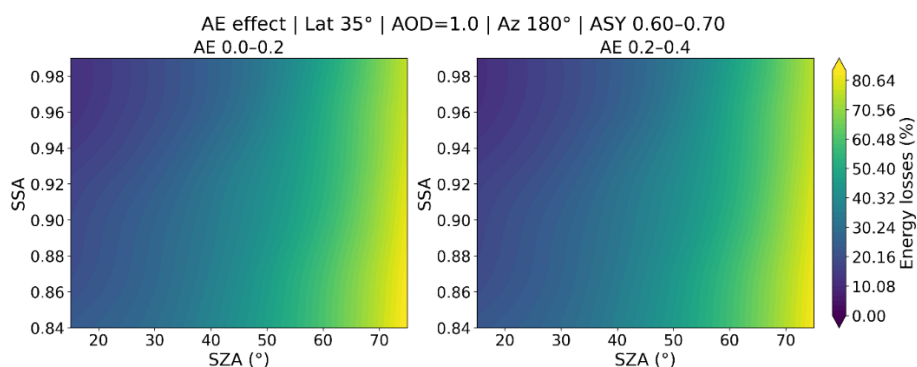

**Figure S3.** Sensitivity of PV energy losses (%) to the Ångström exponent (AE = 0.0–0.2 and 0.2–0.4) at latitude 35° N for AOD = 1.0 and south-oriented PV panels (azimuth 180°).

### S4 Additional figure

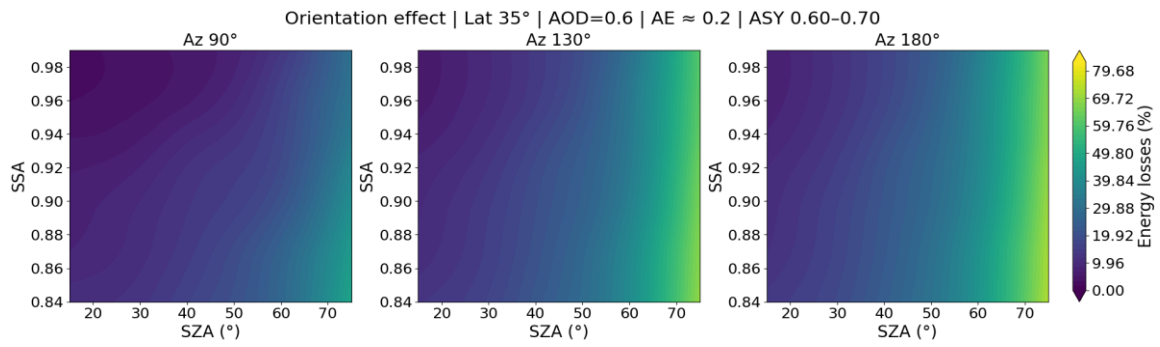

**Figure S4.** Sensitivity of PV energy losses (%) to PV panel orientation (azimuth 90°, 130°, and 180°) at latitude 35° N under moderate dust conditions (AOD = 0.6, AE ≈ 0.2).

### S5 Additional figure

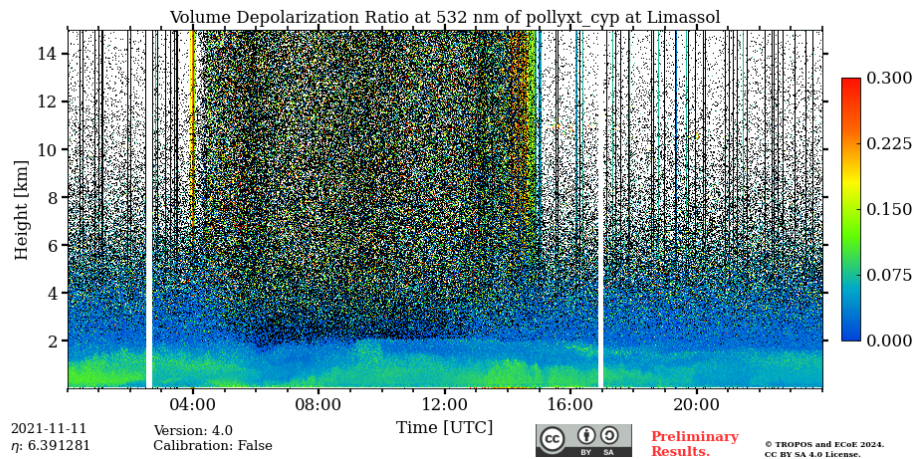

**Figure S5.** Depolarization ratio from ground-based lidar observations at 532 nm at Limassol during the second day of the event, on 11/11/2021.

## S6 Additional figure

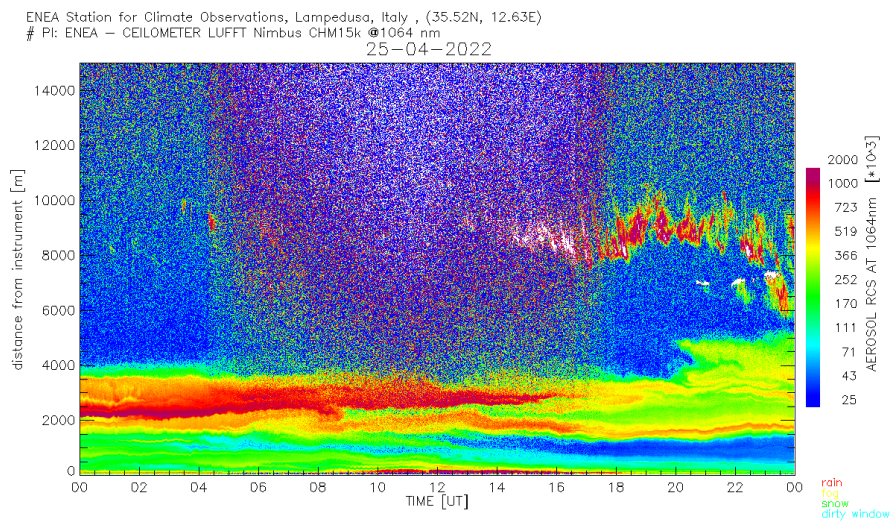

**Figure S6.** Ground-based ceilometer observations at 1064 nm at Lampedusa station during the fifth day of the event, on 25/04/2022.
